# Supplementary material for: DiME: A Scalable Disease Module Identification Algorithm with Application to Glioma Progression
Source: PubMed Central journal article supplement (PMC3921127; doi:10.1371/journal.pone.0086693), 2014-02-11
Supplement: pone.0086693.s001.pdf [file pone.0086693.s001.pdf]

## **Supporting Information for DiME: A scalable disease module identification algorithm with application to glioma progression**

Yunpeng Liu<sup>1</sup>, Daniel A. Tennant<sup>2</sup>, Zexuan Zhu<sup>4</sup>, John K. Heath<sup>3</sup>, Xin Yao<sup>1</sup>, Shan He<sup>1,3\*</sup>

**1 School of Computer Science, University of Birmingham, Birmingham, UK**

**2 School of Cancer Sciences, University of Birmingham, Birmingham, UK**

**3 Centre for Systems Biology, School of Biological Sciences, University of Birmingham, Birmingham, UK**

**4 College of Computer Science and Software Engineering, Shenzhen University, China**

**\* E-mail: s.he@cs.bham.ac.uk**

## The B-score Algorithm Pseudo-code

---

**Algorithm 1** The B-score Algorithm
 

---

```

1: function BSCORE(module  $C$ )
2:    $t \leftarrow 0, C_0 \leftarrow C, B_0 \leftarrow \emptyset, n_C \leftarrow |C|$ 
3:   while  $t < n_C - 1$  do
4:     for each  $i \in C_t$  do
5:       Calculate  $p_i$  as  $p_i = \sum_{q=k_i^{int}}^{k_i} f(q|C)$ 
6:     end for
7:      $w_{t+1} \leftarrow$  vertex in  $C_t$  with highest  $p_i$ 
8:      $w_{t+2} \leftarrow$  vertex in  $C_t$  with second highest  $p_i$ 
9:      $B_{t+1} \leftarrow B_t \cup \{w_{t+1}\}, C_{t+1} \leftarrow C_t \setminus \{w_{t+1}\}$ 
10:    Recalculate  $p$  values for all nodes currently in  $B_{t+1}$ 
11:     $p_l \leftarrow$  lowest  $p$  value of vertices in  $B_{t+1}$ 
12:    if  $p_{w_{t+2}} > p_l$  then
13:      swap( $p_{w_{t+2}}, p_l$ )
14:    end if
15:    Compute  $Pr(< S_{t+1} | C_{t+1}, B_{t+1}, p_{w_{t+2}})$ , where  $S_{t+1} = \sum_{i \in B_{t+1}} p_i$ 
16:     $t \leftarrow t + 1$ 
17:  end while
18:  Return  $\min_t Pr(< S_t | C_t, B_t, p_{w_{t+1}})$ 
19: end function

```

---

The B-score measure assumes a null model where edges within the module (community) of interest is held unchanged while the remaining connections in the network are randomly shuffled. A probabilistic measure based on hypergeometric distribution is then calculated for each module member to evaluate the likelihood that the observed number of within-module edges would arise from the null model. Such a probability is then summed over the number of possible within-module connections (from the observed value to the maximum possible value - the total degree of the node) to give a cumulative probability  $p_i$  of observing an intra-module degree equal to or larger than the observed value under the null model.

The above  $p_i$  is calculated for all nodes in the module and sorted to identify the “worst” node in the module - the node with the highest  $p_i$ . The B-score algorithm assumes that, for a truly non-random module, the probability of observing such a worst  $p_i$  value as the *minimum* among all nodes currently not belonging to the module is expected to be very low under the null model for its calculation. The original B-score algorithm also incorporated a stochastic element into the calculation of  $p_i$ , took into consideration a list of  $k$  worst nodes in the module and utilized the probability that the sum of the scores of these worst nodes in a module obtained from a random background model is smaller than the observed value as the final statistical significance measure (the B-score) for the module. The B-score is calculated over multiple runs and the average is used for evaluation of module statistical significance. Such an additional step has been shown to act as a resampling step and guard against possible significant community structure from random graphs.

## Calculation of the conservation score

We first define a reference network which can be seen as the ground true network without noise. We extract the modules from the network as reference modules:  $R_i$  ( $i = 1, \dots, n_r$ ). We also define a set of  $m$  noisy co-expression networks by introducing  $m$  different levels of edge noise to the reference network.

We extract the modules  $N_{i_j}$  ( $i = 1, \dots, n_m$ ) from the  $j$ th noisy network and repeat this for all  $m$  noisy networks. Then we perform the following steps to calculate the conservation score.

1. Find the best matching module  $N_{k_j}$  in the  $j$ th noisy network for the  $k$ th reference modules  $R_k$ , where  $k_j$  is obtained by:

$$k_j = \arg \max_i \frac{|R_k \cap N_{i_j}|}{\min(|R_k|, |N_{i_j}|)}$$

2. Repeat step 1 to find the best matching modules in all  $m$  noisy networks:  $N_{k_j}$ ,  $j = 1, \dots, m$ .
3. Calculate the conservation score for the reference module  $R_k$  using the following formula:

$$\text{ConservationScore}(R_k) = \frac{|R_k \cap_{j=1}^m N_{k_j}|}{|R_k|}$$

4. Repeat steps 1-3 to calculate conservation scores of all reference modules  $\text{ConservationScore}(R_i)$ ,  $i = 1, \dots, n_r$ .

## Derivation of $\Delta \tilde{W}$

Let  $x_i$  be the boolean variable indicating whether the  $i$ th node is selected as a community member. Denote the entire set of nodes as  $V$ , and  $N$  as the total number of nodes in  $V$ . Let  $\mathbf{A}$  be the adjacency matrix of the entire network. Following the denotations used by Zhao et al. (2011), we have

$$\tilde{W}_S = O_S \cdot \frac{|S_c|}{|S|} + O_S - (O_S + B_S) = \sum_{i,j \in S} A_{ij} x_i x_j \left( \frac{|S_c|}{|S|} + 1 \right) - \sum_{i \in S, j \in V} A_{ij} x_i \quad (1)$$

If node  $k$  is in  $S$ , the only move that will change  $\tilde{W}$  is to move it from  $S$  to  $S_c$ . The new  $\tilde{W}$  after moving will be:

$$\tilde{W}_{S'} = \left( \sum_{i,j \in S} A_{ij} x_i x_j - 2 \sum_{j \in S} A_{kj} x_j \right) \left( \frac{|S_c| + 1}{|S| - 1} + 1 \right) - \left( \sum_{i \in S, j \in V} A_{ij} x_i - \sum_{j \in V} A_{kj} \right); \quad (2)$$

and if node  $k$  is in  $S_c$ , the only move that will change  $\tilde{W}$  is to move it from  $S_c$  to  $S$ . The new  $\tilde{W}$  after moving will be:

$$\tilde{W}_{S'} = \left( \sum_{i,j \in S} A_{ij} x_i x_j + 2 \sum_{j \in S} A_{kj} x_j \right) \left( \frac{|S_c| - 1}{|S| + 1} + 1 \right) - \left( \sum_{i \in S, j \in V} A_{ij} x_i + \sum_{j \in V} A_{kj} \right) \quad (3)$$

Therefore, we can calculate the change in the value of  $\tilde{W}$  when node  $k$  is in  $S$ :

$$\begin{aligned} \Delta \tilde{W}_k &= \tilde{W}_{S'} - \tilde{W} \\ &= \left( O_S - 2 \sum_{j \in S} A_{kj} x_j \right) \left( \frac{|S_c| + 1}{|S| - 1} \right) - O_S \cdot \frac{|S_c|}{|S|} - \sum_{j \in S} A_{kj} x_j + \sum_{j \in S} A_{kj} \end{aligned} \quad (4)$$

$$= O_S \cdot \frac{N}{|S|(|S| - 1)} - 2 \frac{N}{|S| - 1} \sum_{j \in S} A_{kj} x_j + \sum_{j \in S} A_{kj}, \quad (5)$$

Similarly, we can obtain  $\Delta\tilde{W}$  when node  $k$  is in  $S_c$

$$\begin{aligned}\Delta\tilde{W}_k &= \tilde{W}_{S'} - \tilde{W} \\ &= \left( O_S + 2 \sum_{j \in S} A_{k_j} x_j \right) \left( \frac{|S_c| - 1}{|S| + 1} \right) - O_S \cdot \frac{|S_c|}{|S|} + \sum_{j \in S} A_{k_j} x_j - \sum_{j \in S} A_{k_j}\end{aligned}\quad (6)$$

$$= -O_S \cdot \frac{N}{|S|(|S| + 1)} + 2 \frac{N}{|S| + 1} \sum_{j \in S} A_{k_j} x_j - \sum_{j \in S} A_{k_j}, \quad (7)$$

Combine the above two equations, we finally derive the equation for  $\Delta\tilde{W}$ :

$$\Delta\tilde{W}_k = \begin{cases} O_S \cdot \frac{N}{|S|(|S|-1)} - 2 \frac{N}{|S|-1} \sum_{j \in S} A_{k_j} x_j + \sum_{j \in S} A_{k_j} & \text{if } k \in S \\ -O_S \cdot \frac{N}{|S|(|S|+1)} + 2 \frac{N}{|S|+1} \sum_{j \in S} A_{k_j} x_j - \sum_{j \in S} A_{k_j} & \text{if } k \in S_c \end{cases}$$

where  $O_S = \sum_{i,j \in S} A_{ij} x_i x_j$ .

It is easy to observe from (9) and (10) that the change in  $\tilde{W}$  for any flipping of node membership can be calculated in linear time ( $O_S$  itself can be updated in linear time for each flip too).

## Two Unique DiME Modules in the Grade II and IV Glioma Co-expression Networks

### Figure Legends

### Tables

**Table S1.** Relative loss of genes under different B-score cutoffs

| B-score Cutoff                               | Technique                      |                                |                                |                               |                               |                               |                                |                                |                                |
|----------------------------------------------|--------------------------------|--------------------------------|--------------------------------|-------------------------------|-------------------------------|-------------------------------|--------------------------------|--------------------------------|--------------------------------|
|                                              | DiME                           |                                |                                | MCODE                         |                               |                               | Modularity                     |                                |                                |
|                                              | 0.05                           | 0.001                          | $1 \times 10^{-5}$             | 0.05                          | 0.001                         | $1 \times 10^{-5}$            | 0.05                           | 0.001                          | $1 \times 10^{-5}$             |
| Rembrandt Data<br>( <b>GBM</b> )             | <b>32.97%</b><br>(574 / 1741)  | <b>50.09%</b><br>(872 / 1741)  | <b>54.68%</b><br>(952 / 1741)  | <b>58.09%</b><br>(452 / 778)  | <b>81.36%</b><br>(633 / 778)  | <b>83.03%</b><br>(646 / 778)  | <b>41.16%</b><br>(1073 / 2607) | <b>49.33%</b><br>(1286 / 2607) | <b>99.04%</b><br>(2582 / 2607) |
| TCGA Data<br>( <b>GBM</b> )                  | <b>30.19%</b><br>(358 / 1186)  | <b>42.50%</b><br>(504 / 1186)  | <b>51.85%</b><br>(615 / 1186)  | <b>33.75%</b><br>(188 / 557)  | <b>39.14%</b><br>(218 / 557)  | <b>45.60%</b><br>(254 / 557)  | <b>2.14%</b><br>(36 / 1681)    | <b>45.63%</b><br>(767 / 1681)  | <b>90.78%</b><br>(1526 / 1681) |
| Rembrandt Data<br>( <b>grade II Glioma</b> ) | <b>47.27%</b><br>(1230 / 2602) | <b>62.95%</b><br>(1638 / 2602) | <b>68.14%</b><br>(1773 / 2602) | <b>61.96%</b><br>(728 / 1175) | <b>65.79%</b><br>(773 / 1175) | <b>69.96%</b><br>(822 / 1175) | <b>94.97%</b><br>(3546 / 3734) | <b>98.23%</b><br>(3668 / 3734) | <b>98.93%</b><br>(3694 / 3734) |
| GEO Data<br>( <b>grade II Glioma</b> )       | <b>42.46%</b><br>(1106 / 2605) | <b>66.64%</b><br>(1736 / 2605) | <b>71.48%</b><br>(1862 / 2605) | <b>56.59%</b><br>(466 / 822)  | <b>67.76%</b><br>(557 / 822)  | <b>74.70%</b><br>(614 / 822)  | <b>94.76%</b><br>(3255 / 3435) | <b>99.33%</b><br>(3412 / 3435) | <b>99.71%</b><br>(3425 / 3435) |

**Table S2.** Module Members in A Unique DiME Module (Grade II Glioma) Larger than 10 Genes

| Module Name                                                                             | Gene Symbol                                          | Gene Product                                                  |
|-----------------------------------------------------------------------------------------|------------------------------------------------------|---------------------------------------------------------------|
| Mesenchyme morphogenesis<br>and cell division /<br>differentiation<br>(grade II glioma) | <i>MEX3A</i>                                         | Mex-3 RNA Binding Family Member A                             |
|                                                                                         | <i>EBF4</i>                                          | Early B-Cell Factor 4                                         |
|                                                                                         | <i>HEY1</i>                                          | Hairy/Enhancer-Of-Split Related With YRPW Motif 1             |
|                                                                                         | <i>KCNQ2</i>                                         | Potassium Voltage-Gated Channel, KQT-Like Subfamily, Member 2 |
|                                                                                         | <i>SLC13A3</i>                                       | Solute Carrier Family 13 Member 3                             |
|                                                                                         | <i>SLC22A15</i>                                      | Solute Carrier Family 22, Member 15                           |
|                                                                                         | <i>ABCA5</i>                                         | ATP-Binding Cassette, Sub-Family A (ABC1), Member 5           |
|                                                                                         | <i>CAMKMT</i>                                        | Calmodulin-Lysine N-Methyltransferase                         |
|                                                                                         | <i>PNPLA4</i>                                        | Patatin-Like Phospholipase Domain Containing 4                |
|                                                                                         | <i>RGN</i>                                           | Regucalcin                                                    |
|                                                                                         | <i>ECHDC2</i>                                        | Enoyl CoA Hydratase Domain Containing 2                       |
|                                                                                         | <i>PRMT5</i>                                         | Protein Arginine Methyltransferase 5                          |
|                                                                                         | <i>MAML2</i>                                         | Mastermind-Like 2                                             |
|                                                                                         | <i>ZNF22</i>                                         | Zinc Finger Protein 22                                        |
|                                                                                         | <i>C16orf89</i>                                      | (Chromosome 16 Open Reading Frame 89)                         |
|                                                                                         | <i>KLHL26</i>                                        | Kelch-Like Family Member 26                                   |
|                                                                                         | <i>CLQL1</i>                                         | Complement Component 1, Q                                     |
|                                                                                         | <i>KLRC3</i>                                         | Killer Cell Lectin-Like Receptor Subfamily C, Member 3        |
|                                                                                         | <i>S100A13</i>                                       | S100 Calcium Binding Protein A13                              |
|                                                                                         | <i>SELENBP1</i>                                      | Selenium Binding Protein 1                                    |
|                                                                                         | <i>TPPP3</i>                                         | Tubulin Polymerization-Promoting Protein Family Member 3      |
|                                                                                         | <i>MYC</i>                                           | Proto-Oncogene C-Myc                                          |
|                                                                                         | <i>FAM50B</i>                                        | Family With Sequence Similarity 50, Member B                  |
|                                                                                         | <i>CHST6</i>                                         | Carbohydrate (N-Acetylglucosamine 6-O) Sulfotransferase 6     |
|                                                                                         | <i>RYR3</i>                                          | Ryanodine Receptor 3                                          |
|                                                                                         | <i>RCAN3</i>                                         | Calcipressin-3                                                |
|                                                                                         | <i>PHLDA1</i>                                        | Pleckstrin Homology-Like Domain, Family A, Member 1           |
|                                                                                         | <i>SULF2</i>                                         | Sulfatase 2                                                   |
| <i>RPLP0</i>                                                                            | Ribosomal Protein, Large, P0                         |                                                               |
| <i>CDKL2</i>                                                                            | Cyclin-Dependent Kinase-Like 2 (CDC2-Related Kinase) |                                                               |
| <i>C11orf96</i>                                                                         | Chromosome 11 Open Reading Frame 96                  |                                                               |
| <i>STPG1</i>                                                                            | Sperm-Tail PG-Rich Repeat Containing 1               |                                                               |

**Table S3.** Module Members in A Unique DiME Module (Grade IV Glioma) Larger than 10 Genes

| Module Name                                               | Gene Symbol                           | Gene Product                                                                |
|-----------------------------------------------------------|---------------------------------------|-----------------------------------------------------------------------------|
| Regulation of vesicle-related processes (grade IV glioma) | <i>MGAT1</i>                          | Mannosyl (Alpha-1,3-)-Glycoprotein Beta-1,2-N-Acetylglucosaminyltransferase |
|                                                           | <i>RAB32</i>                          | Ras-Related Protein Rab-32                                                  |
|                                                           | <i>ANKRD13B</i>                       | Ankyrin Repeat Domain-Containing Protein 13B                                |
|                                                           | <i>SBK1</i>                           | SH3 Domain Binding Kinase 1                                                 |
|                                                           | <i>SGMS2</i>                          | Sphingomyelin Synthase 2                                                    |
|                                                           | <i>PLBD1</i>                          | Phospholipase B Domain Containing 1                                         |
|                                                           | <i>LRRTM2</i>                         | Leucine Rich Repeat Transmembrane Neuronal 2                                |
|                                                           | <i>FSD1</i>                           | Fibronectin Type III And SPRY Domain Containing 1                           |
|                                                           | <i>WIPI1</i>                          | WD Repeat Domain, Phosphoinositide Interacting 1                            |
|                                                           | <i>BICC1</i>                          | Bicaudal C Homolog 1                                                        |
|                                                           | <i>SOX8</i>                           | SRY (Sex Determining Region Y)-Box 8                                        |
|                                                           | <i>RRAS</i>                           | Related RAS Viral (R-Ras) Oncogene Homolog                                  |
|                                                           | <i>LMF1</i>                           | Lipase Maturation Factor 1                                                  |
| <i>GATAD2B</i>                                            | GATA Zinc Finger Domain Containing 2B |                                                                             |
